# Supplementary material
Source: MDPI journal article supplement (https://www.mdpi.com/1996-1073/15/17/6328)
Supplement: s1 [file s1]

# Supplemental information - Review and techno-economic analysis of emerging thermo-mechanical energy storage technologies

Gautam, K.R.<sup>1,\*</sup>, Victoria, M.<sup>1,2</sup>, Andresen, G.B.<sup>1,2</sup>

<sup>1</sup>Department of Mechanical Engineering, Aarhus University, Inge Lehmanns Gade 10, Aarhus C, 8000, Denmark

<sup>2</sup>iCLIMATE Interdisciplinary Centre for Climate Change, Aarhus University, Denmark,

## Section SI Off-grid system with abundant wind and solar

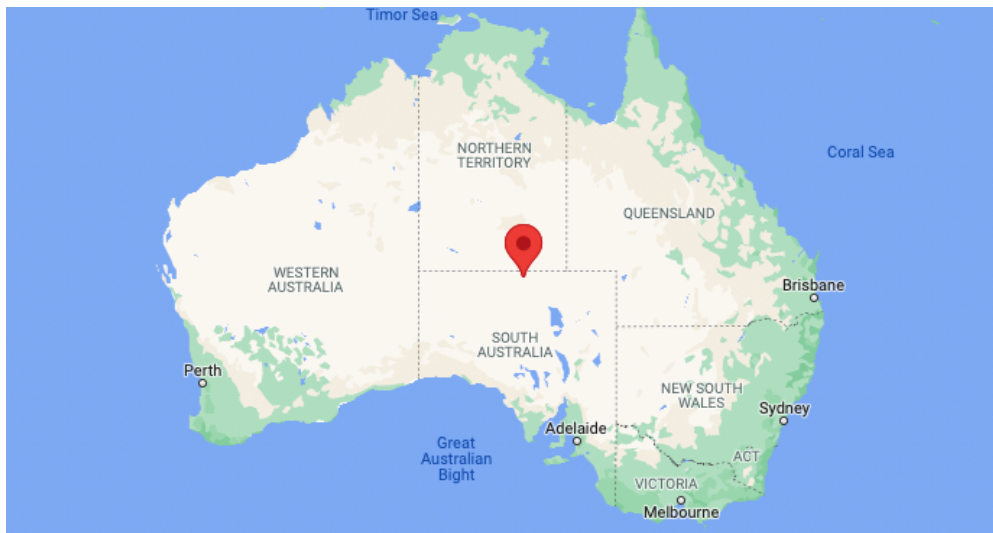

Figure S1: Off-grid system chosen to demonstrate location with abundant wind and solar.

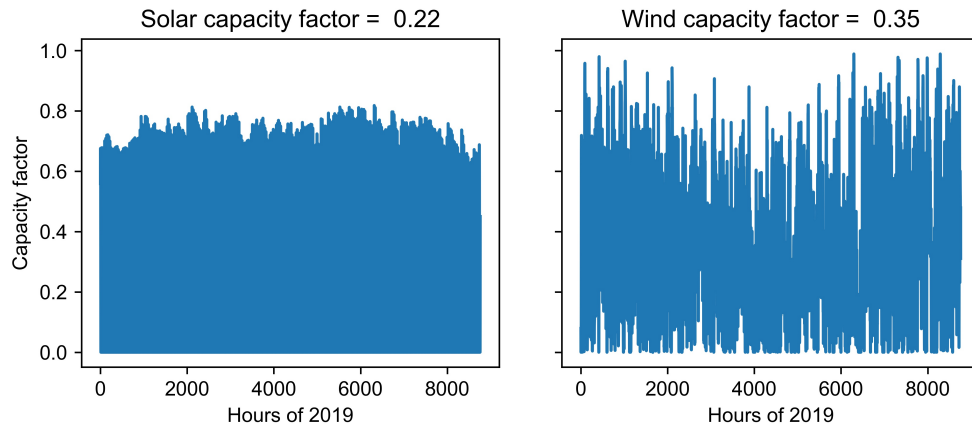

Figure S2: Wind and solar capacity factors for the off-grid system in Australia.

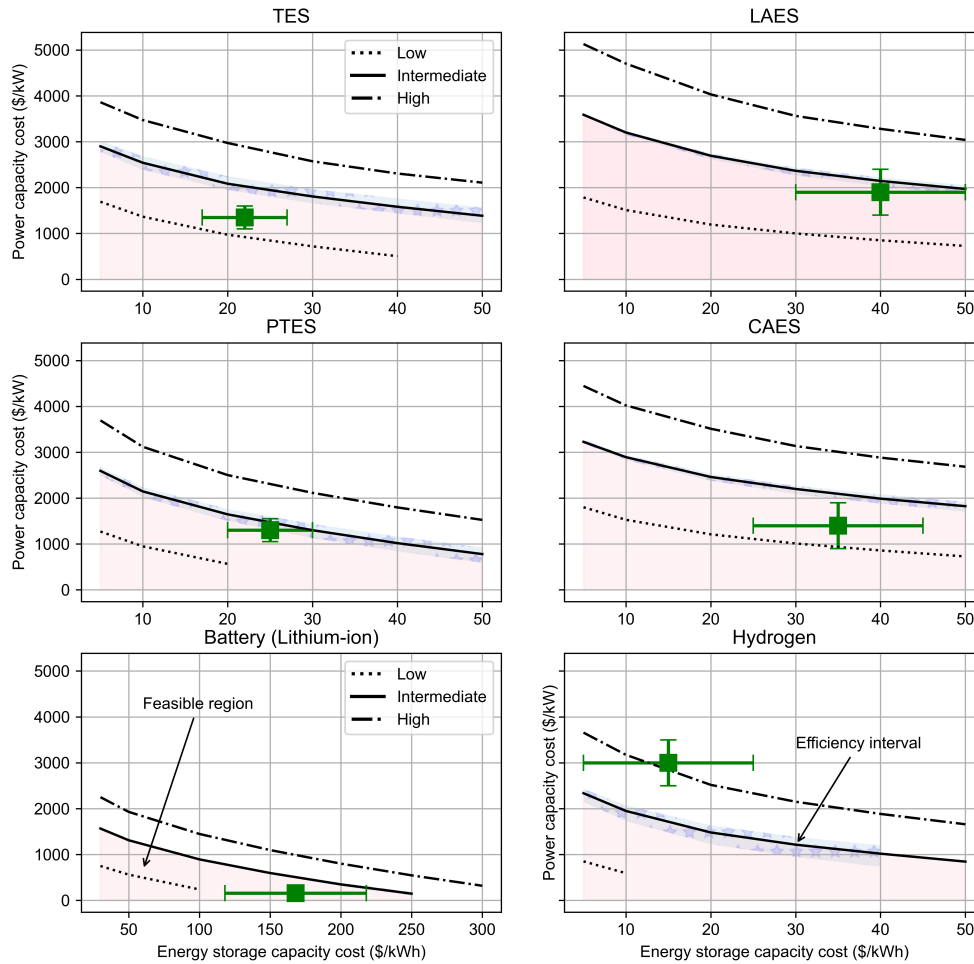

Figure S3: Investment cost curves for storage technologies to be economically viable in the off-grid energy system (Australia) when the storage size is limited to discharge 1% of annual energy demand.

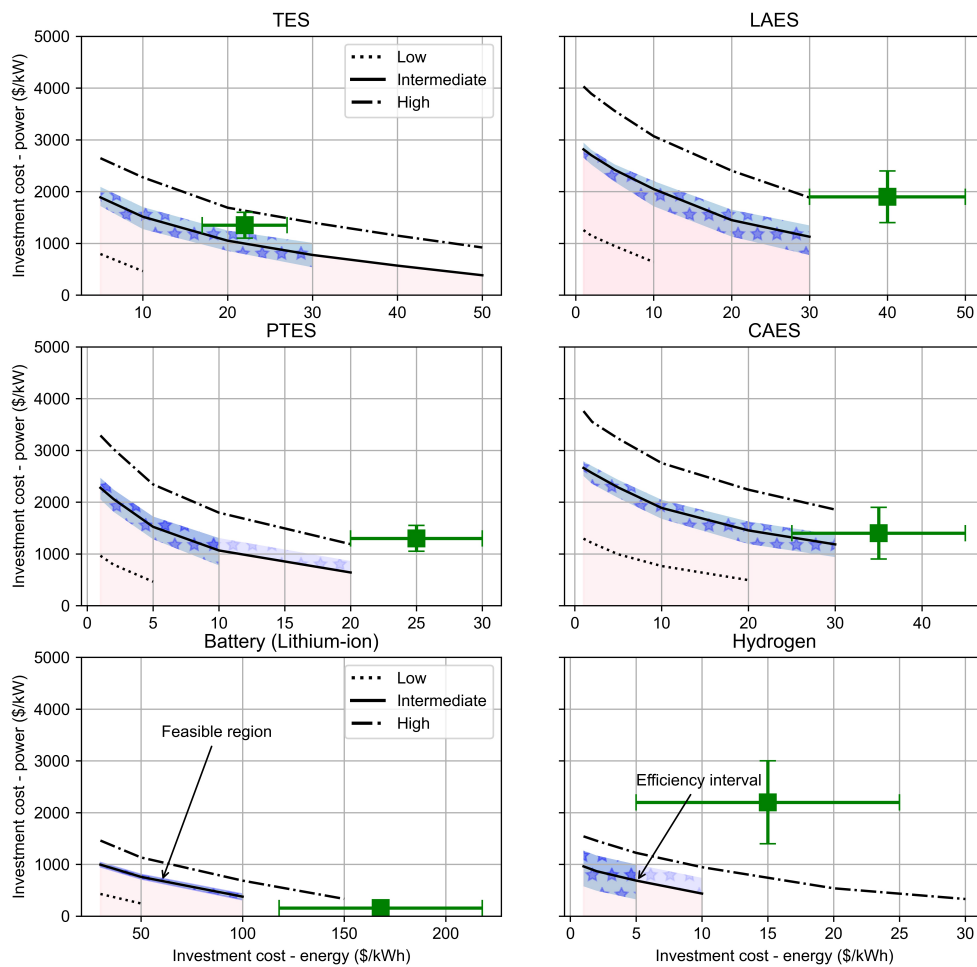

Figure S4: Investment cost curves for storage technologies to be economically viable in the off-grid energy system (Australia) when the storage size is sized to discharge at least 5% of annual energy demand.

## Section SII Off-grid system dominated by wind

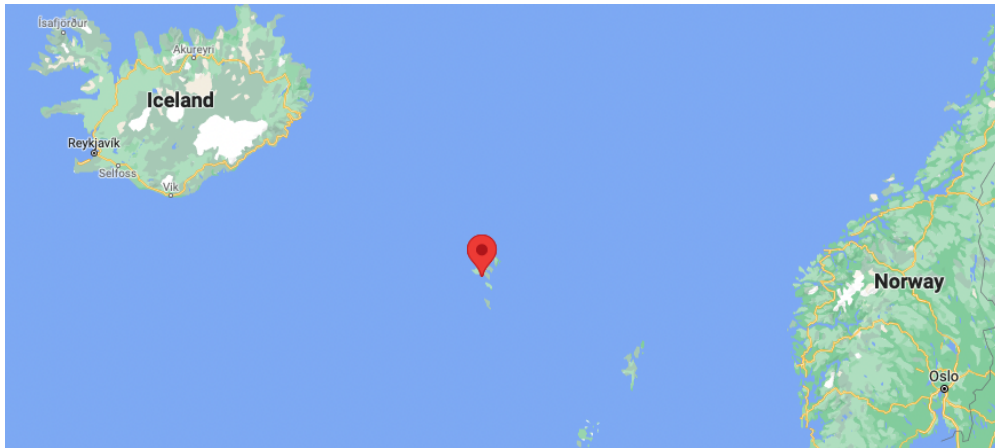

Figure S5: Off-grid system chosen to demonstrate wind dominated location (Faroe Island).

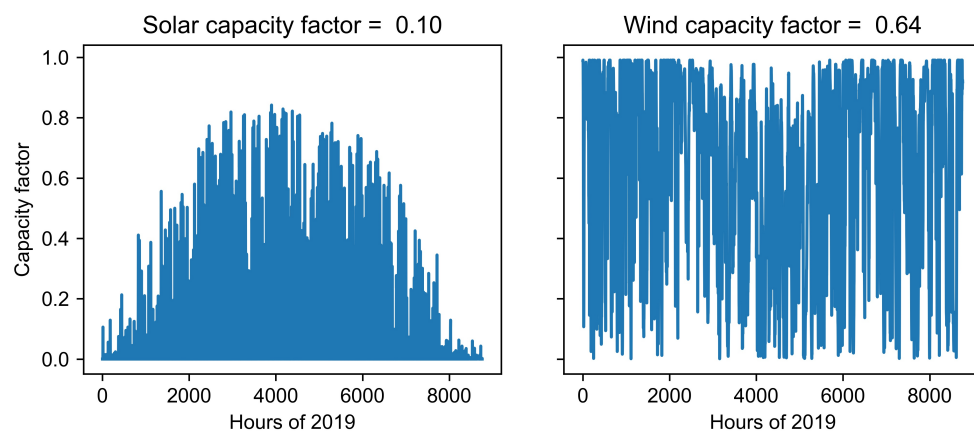

Figure S6: Wind and solar capacity factors for the off-grid system in Faroe Island.



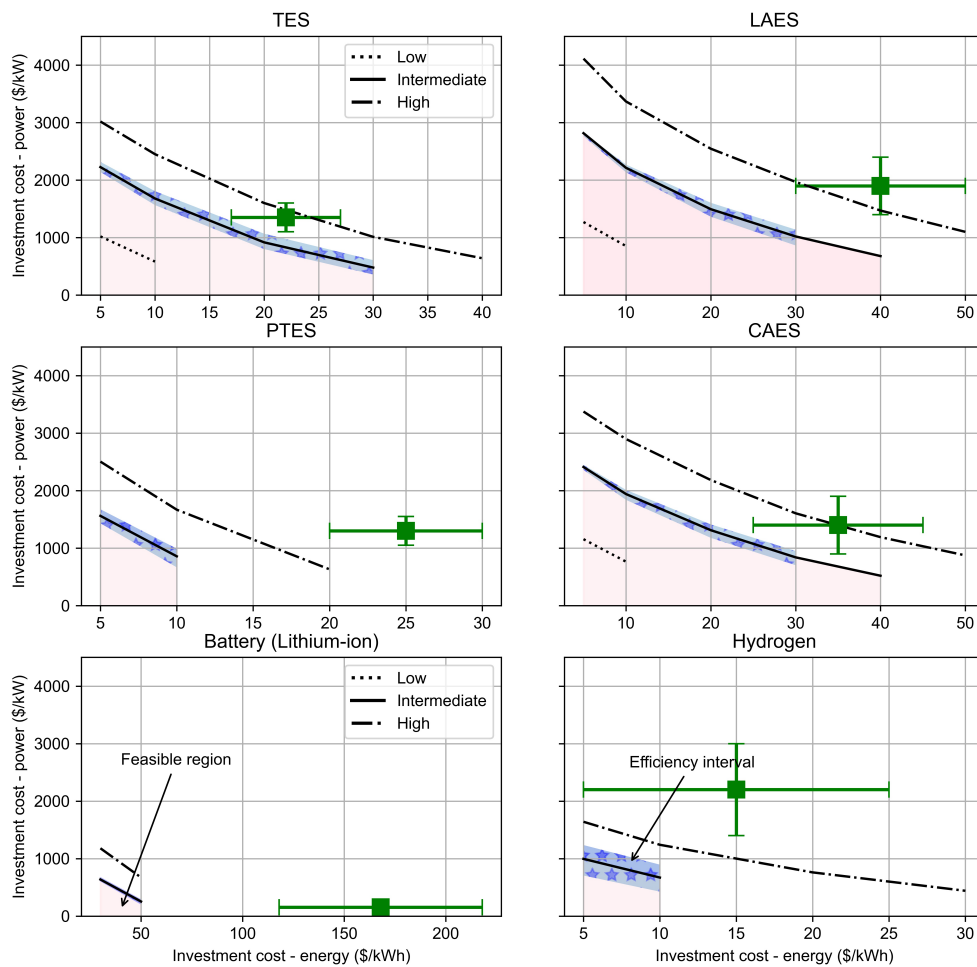

Figure S7: Investment cost curves for storage technologies to be economically viable in the off-grid energy system (Faroe Island) when the storage size is limited to discharge 2% of annual energy demand.

### Section SIII Off-grid system dominated by Solar

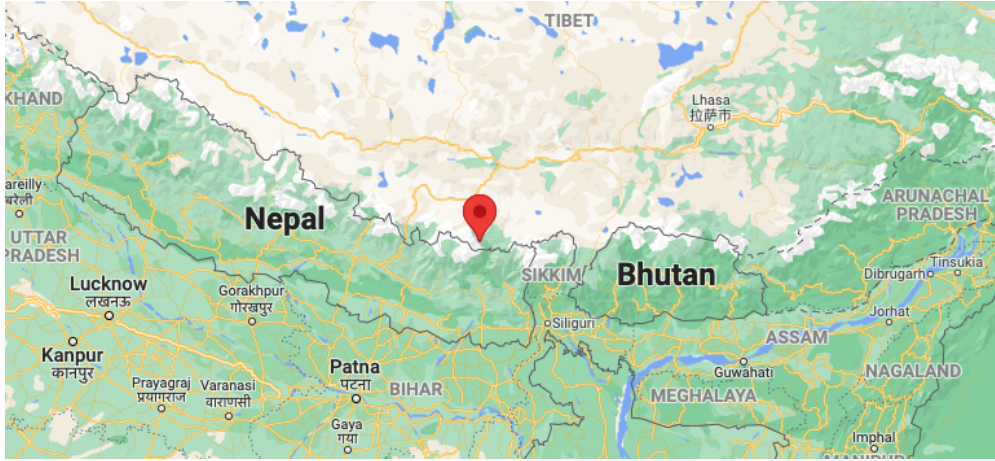

Figure S8: Off-grid system chosen to demonstrate solar dominated location (Tibet).

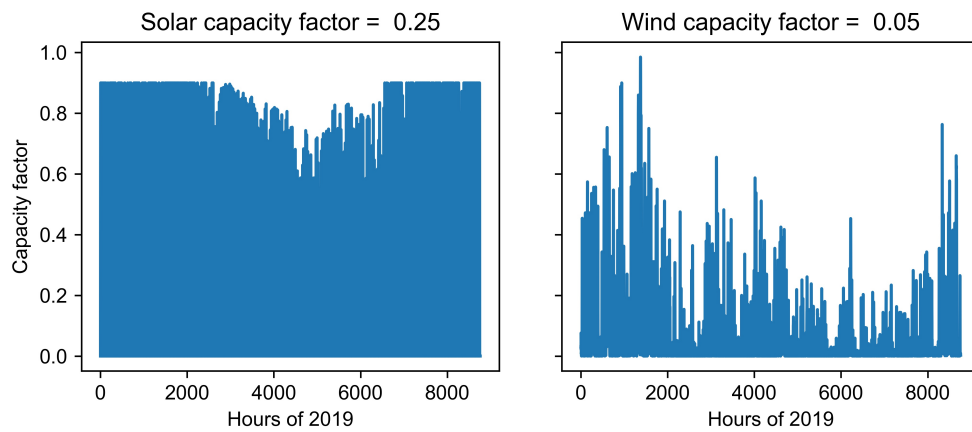

Figure S9: Wind and solar capacity factors for the off-grid system in Tibet.

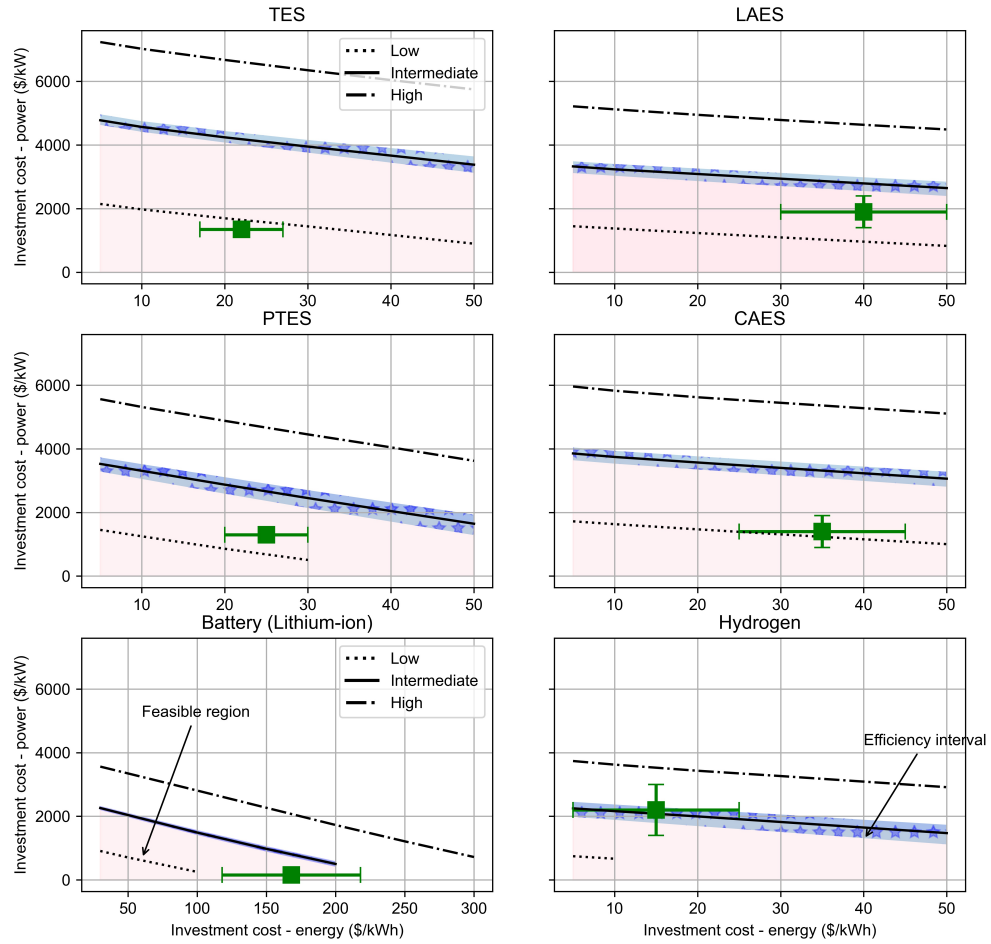

Figure S10: Investment cost curves for storage technologies to be economically viable in the off-grid energy system (Tibet) when the storage size is limited to discharge 2% of annual energy demand.
